# Supplementary material for: ECG-ViEW II, a freely accessible electrocardiogram database
Source: PLoS One. 2017 Apr 24;12(4):e0176222. doi: 10.1371/journal.pone.0176222 (PMC5402933; doi:10.1371/journal.pone.0176222)
Supplement: S5 Table — (XLSX) [file pone.0176222.s008.xlsx]

## Sheet: Sheet1
S5 Table. The number of times the diagnostic code was used in ECG-ViEW II database
ICD-10 code	Diagnosis	Patients (n)
I10	Essential (primary) hypertension	42766
K29	Gastritis and duodenitis	36208
E11	Type 2 diabetes mellitus	33740
K21	Gastroesophageal reflux disease	17713
I20	Angina pectoris	14153
J35	Chronic diseases of the tonsils and adenoids	14025
K76	Other diseases of the liver	13887
M25	Other joint disorders, NEC	13030
E78	Disorders of lipoprotein metabolism and other lipidemias	12439
C16	Malignant neoplasm of the stomach	12012
S02	Fracture of the skull and facial bones	11328
I25	Chronic ischemic heart disease	10191
D25	Leiomyoma of the uterus	10088
J18	Pneumonia, organism unspecified	9938
J45	Asthma	9816
K25	Gastric ulcer	9580
I63	Cerebral infarction	9287
H25	Senile cataract	8950
M51	Other intervertebral disc disorders	8447
H81	Disorders of vestibular function	8234
N18	Chronic kidney disease	8132
E04	Other nontoxic goitre	8121
A09	Other gastroenteritis and colitis of infectious and unspecified origin	8056
C73	Malignant neoplasm of thyroid gland	7989
K80	Cholelithiasis	7884
H66	Suppurative and unspecified otitis media	7648
N40	Hyperplasia of prostate	7566
J32	Chronic sinusitis	7444
M81	Osteoporosis without pathological fracture	7404
A16	Respiratory tuberculosis, not confirmed bacteriologically or histologically	7174
M54	Dorsalgia	7127
D24	Benign neoplasm of breast	7031
K05	Gingivitis and periodontal diseases	7030
J30	Vasomotor and allergic rhinitis	6726
E05	Thyrotoxicosis[hyperthyroidism]	6644
N20	Calculus of kidney and ureter	6429
F32	Depressive episode	6395
K59	Other functional intestinal disorders	6384
K30	Functional dyspepsia	6330
N87	Dysplasia of cervix uteri	6321
D13	Benign neoplasm of other and ill-defined parts of digestive system	6261
C34	Malignant neoplasm of bronchus and lung	6213
S06	Intracranial injury	6208
N95	Menopausal and other perimenopausal disorders	6119
J34	Other disorders of nose and nasal sinuses	5984
N39	Other disorders of urinary system	5818
D27	Benign neoplasm of ovary	5394
L50	Urticaria	5326
K92	Other diseases of digestive system	5254
I21	Acute myocardial infarction	5182
E66	Obesity	5174
H04	Disorders of lacrimal system	5056
J44	Other chronic obstructive pulmonary disease	5006
D12	Benign neoplasm of colon, rectum, anus and anal canal	4911
B02	Zoster [herpes zoster]	4838
K35	Acute appendicitis	4811
N80	Endometriosis	4800
C22	Malignant neoplasm of liver and intrahepatic bile ducts	4777
M79	Other soft tissue disorders, NEC	4761
J31	Chronic rhinitis, nasopharyngitis and pharyngitis	4619
C50	Malignant neoplasm of breast	4613
E14	Unspecified diabetes mellitus	4586
F41	Other anxiety disorders	4533
J00	Acute nasopharyngitis[common cold]	4476
B18	Chronic viral hepatitis	4395
K26	Duodenal ulcer	4375
I48	Atrial fibrillation and flutter	4291
M48	Other spondylopathies	4288
D34	Benign neoplasm of thyroid gland	4287
J06	Acute upper respiratory infections of multiple and unspecified sites	4258
K58	Irritable bowel syndrome	4192
I50	Heart failure	4188
H36	Retinal disorders in diseases classified elsewhere	3931
J38	Diseases of vocal cords and larynx, NEC	3890
D50	Iron deficiency anaemia	3859
G44	Other headache syndromes	3745
K74	Fibrosis and cirrhosis of liver	3719
H65	Nonsuppurative otitis media	3708
N30	Cystitis	3676
H35	Other retinal disorders	3675
H40	Glaucoma	3614
E03	Other hypothyroidism	3607
K81	Cholecystitis	3605
C18	Malignant neoplasm of colon	3515
F45	Somatoform disorders	3487
K40	Inguinal hernia	3464
N84	Polyp of female genital tract	3407
D06	Carcinoma in situ of cervix uteri	3362
B35	Dermatophytosis	3359
M19	Other arthrosis	3333
K70	Alcoholic liver disease	3323
J02	Acute pharyngitis	3249
T14	Injury of unspecified body region	3136
H90	Conductive and sensorineural hearing loss	3077
M50	Cervical disc disorders	2961
F51	Nonorganic sleep disorders	2909
K01	Embedded and impacted teeth	2903
J93	Pneumothorax	2873
S82	Fracture of lower leg, including ankle	2825
S22	Fracture of rib(s), sternum and thoracic spine	2821
J03	Acute tonsillitis	2799
J98	Other respiratory disorders	2713
I49	Other cardiac arrhythmias	2680
I60	Subarachnoid haemorrhage	2679
E06	Thyroiditis	2658
J47	Bronchiectasis	2609
H50	Other strabismus	2556
G47	Sleep disorders	2536
J33	Nasal polyp	2509
H02	Other disorders of eyelid	2507
S00	Superficial injury of head	2481
M05	Seropositive rheumatoid arthritis	2481
N10	Acute tubulo-interstitial nephritis	2468
L20	Atopic dermatitis	2374
M82	Osteoporosis in diseases classified elsewhere	2368
G40	Epilepsy	2353
S32	Fracture of lumbar spine and pelvis	2352
M06	Other rheumatoid arthritis	2347
S72	Fracture of femur	2343
K02	Dental caries	2325
K75	Other inflammatory liver diseases	2297
N31	Neuromuscular dysfunction of bladder, NEC	2265
K56	Paralytic ileus and intestinal obstruction without hernia	2245
M75	Shoulder lesions	2230
I61	Intracerebral haemorrhage	2216
H10	Conjunctivitis	2208
L03	Cellulitis	2137
I67	Other cerebrovascular diseases	2132
N97	Female infertility	2081
C53	Malignant neoplasm of cervix uteri	2069
K63	Other diseases of intestine	2037
C20	Malignant neoplasm of rectum	2026
N76	Other inflammation of vagina and vulva	2023
I51	Complications and ill-defined descriptions of heart disease	2017
J15	Bacterial pneumonia, NEC	2009
N72	Inflammatory disease of cervix uteri	1976
K07	Dentofacial anomalies [including malocclusion]	1967
I69	Sequelae of cerebrovascular disease	1963
K04	Diseases of pulp and periapical tissues	1960
K31	Other diseases of stomach and duodenum	1957
F43	Reaction to severe stress, and adjustment disorders	1950
H91	Other hearing loss	1936
M30	Polyarteritis nodosa and related conditions	1897
H93	Other disorders of ear, NEC	1876
S42	Fracture of shoulder and upper arm	1865
G45	Transient cerebral ischaemic attacks and related syndromes	1835
S05	Injury of eye and orbit	1825
K27	Peptic ulcer, site unspecified	1822
D69	Purpura and other haemorrhagic conditions	1816
H52	Disorders of refraction and accommodation	1810
N93	Other abnormal uterine and vaginal bleeding	1803
S01	Open wound of head	1759
G51	Facial nerve disorders	1751
E10	Type 1 diabetes mellitus	1730
S13	Dislocation, sprain and strain of joints and ligaments at neck level	1718
M13	Other arthritis	1705
J90	Pleural effusion, NEC	1659
C61	Malignant neoplasm of prostate	1659
K11	Diseases of salivary glands	1654
N13	Obstructive and reflux uropathy	1650
G43	Migraine	1638
K08	Other disorders of teeth and supporting structures	1638
D68	Other coagulation defects	1624
N73	Other female pelvic inflammatory diseases	1616
N28	Other disorders of kidney and ureter, NEC	1611
M80	Osteoporosis with pathological fracture	1606
I83	Varicose veins of lower extremities	1606
B90	Sequelae of tuberculosis	1598
L72	Follicular cysts of skin and subcutaneous tissue	1593
L23	Allergic contact dermatitis	1586
G50	Disorders of trigeminal nerve	1576
J20	Acute bronchitis	1573
K82	Other diseases of gallbladder	1557
S36	Injury of intra-abdominal organs	1557
S52	Fracture of forearm	1529
I73	Other peripheral vascular diseases	1522
S27	Injury of other and unspecified intrathoracic organs	1518
G62	Other polyneuropathies	1507
H33	Retinal detachments and breaks	1507
M32	Systemic lupus erythematosus	1497
K83	Other diseases of biliary tract	1495
K85	Acute pancreatitis	1470
H43	Disorders of vitreous body	1462
F20	Schizophrenia	1437
L21	Seborrhoeic dermatitis	1429
C67	Malignant neoplasm of bladder	1428
I47	Paroxysmal tachycardia	1423
D64	Other anaemias	1391
M23	Internal derangement of knee	1380
N17	Acute renal failure	1365
M43	Other deforming dorsopathies	1356
N41	Inflammatory diseases of prostate	1342
I42	Cardiomyopathy	1331
H71	Cholesteatoma of middle ear	1325
M35	Other systemic involvement of connective tissue	1303
H11	Other disorders of conjunctiva	1298
G56	Mononeuropathies of upper limb	1297
G81	Hemiplegia	1287
M17	Gonarthrosis[arthrosis of knee]	1278
T88	Other complications of surgical and medical care, NEC	1248
T78	Adverse effects, NEC	1244
D35	Benign neoplasm of other and unspecified endocrine glands	1240
C56	Malignant neoplasm of ovary	1215
I88	Nonspecific lymphadenitis	1209
D18	Haemangioma and lymphangioma, any site	1200
C25	Malignant neoplasm of pancreas	1198
K12	Stomatitis and related lesions	1193
I05	Rheumatic mitral valve diseases	1187
N81	Female genital prolapse	1155
K20	Oesophagitis	1141
J01	Acute sinusitis	1137
A41	Other sepsis	1136
D17	Benign lipomatous neoplasm	1125
L90	Atrophic disorders of skin	1125
A18	Tuberculosis of other organs	1117
N83	Noninflammatory disorders of ovary, fallopian tube and broad ligament	1115
I74	Arterial embolism and thrombosis	1106
L04	Acute lymphadenitis	1094
J40	Bronchitis, not specified as acute or chronic	1094
L30	Other dermatitis	1092
C64	Malignant neoplasm of kidney, except renal pelvis	1070
K52	Other noninfective gastroenteritis and colitis	1056
O24	Diabetes mellitus in pregnancy	1050
N85	Other noninflammatory disorders of uterus, except cervix	1045
E16	Other disorders of pancreatic internal secretion	1041
G25	Other extrapyramidal and movement disorders	1034
L29	Pruritus	1022
S30	Superficial injury of abdomen, lower back and pelvis	1020
K86	Other diseases of pancreas	1019
S62	Fracture at wrist and hand level	1013
S33	Dislocation, sprain and strain of joints and ligaments of lumbar spine and pelvis	999
K65	Peritonitis	997
L81	Other disorders of pigmentation	983
H60	Otitis externa	980
K66	Other disorders of peritoneum	966
D33	Benign neoplasm of brain and other parts of central nervous system	965
B37	Candidiasis	964
B00	Herpesviral [herpes simplex] infections	962
G53	Cranial nerve disorders in diseases classified elsewhere	955
E24	Cushing’s syndrome	928
I71	Aortic aneurysm and dissection	926
N19	Unspecified kidney failure	920
P07	Disorders related to short gestation and low birth weight, NEC	918
K03	Other diseases of hard tissues of teeth	911
J84	Other interstitial pulmonary diseases	911
F31	Bipolar affective disorder	910
M89	Other disorders of bone	909
F00	Dementia in Alzheimer’s disease(G30.-†)	905
H26	Other cataract	902
D21	Other benign neoplasms of connective and other soft tissue	901
O60	Preterm labour and delivery	900
M10	Gout	889
G91	Hydrocephalus	881
N08	Glomerular disorders in diseases classified elsewhere	871
I99	Other and unspecified disorders of circulatory system	870
E23	Hypofunction and other disorders of pituitary gland	870
J37	Chronic laryngitis and laryngotracheitis	869
F90	Hyperkinetic disorders	866
E13	Other specified diabetes mellitus	856
L24	Irritant contact dermatitis	856
E87	Other disorders of fluid, electrolyte and acid-base balance	852
H31	Other disorders of choroid	848
K73	Chronic hepatitis, NEC	847
H34	Retinal vascular occlusions	841
B17	Other acute viral hepatitis	841
K22	Other diseases of oesophagus	839
N92	Excessive, frequent and irregular menstruation	834
L85	Other epidermal thickening	830
G82	Paraplegia and tetraplegia	829
H53	Visual disturbances	828
C24	Malignant neoplasm of other and unspecified parts of biliary tract	825
M65	Synovitis and tenosynovitis	824
A15	Respiratory tuberculosis, bacteriologically and histologically confirmed	822
K57	Diverticular disease of intestine	820
C83	Non-follicular lymphoma	813
C71	Malignant neoplasm of brain	810
G93	Other disorders of brain	807
D23	Other benign neoplasms of skin	799
N60	Benign mammary dysplasia	793
S83	Dislocation, sprain and strain of joints and ligaments of knee	791
G20	Parkinson’s disease	788
B07	Viral warts	784
D11	Benign neoplasm of major salivary glands	769
L70	Acne	766
S80	Superficial injury of lower leg	764
C92	Myeloid leukaemia	762
J21	Acute bronchiolitis	757
N45	Orchitis and epididymitis	756
D10	Benign neoplasm of mouth and pharynx	746
L73	Other follicular disorders	745
D22	Melanocytic naevi	744
I15	Secondary hypertension	737
I86	Varicose veins of other sites	736
F06	Other mental disorders due to brain damage and dysfunction and to physical disease	725
C15	Malignant neoplasm of oesophagus	722
S60	Superficial injury of wrist and hand	721
J43	Emphysema	721
L27	Dermatitis due to substances taken internally	721
O20	Haemorrhage in early pregnancy	718
L28	Lichen simplex chronicus and prurigo	718
S92	Fracture of foot, except ankle	710
G30	Alzheimer’s disease	709
A87	Viral meningitis	704
L25	Unspecified contact dermatitis	704
K71	Toxic liver disease	697
H21	Other disorders of iris and ciliary body	692
P83	Other conditions of integument specific to fetus and newborn	686
T00	Superficial injuries involving multiple body regions	686
N94	Pain and other conditions associated with female genital organs and menstrual cycle	683
N43	Hydrocele and spermatocele	675
S37	Injury of urinary and pelvic organs	673
N64	Other disorders of breast	670
C79	Secondary malignant neoplasm of other and unspecified sites	664
A08	Viral and other specified intestinal infections	660
M67	Other disorders of synovium and tendon	654
S20	Superficial injury of thorax	649
C54	Malignant neoplasm of corpus uteri	647
T18	Foreign body in alimentary tract	646
D05	Carcinoma in situ of breast	634
I70	Atherosclerosis	627
N71	Inflammatory disease of uterus, except cervix	626
M53	Other dorsopathies, NEC	622
K00	Disorders of tooth development and eruption	616
D61	Other aplastic anaemias	611
S12	Fracture of neck	610
C78	Secondary malignant neoplasm of respiratory and digestive organs	608
C32	Malignant neoplasm of larynx	605
M46	Other inflammatory spondylopathies	601
E27	Other disorders of adrenal gland	598
L51	Erythema multiforme	595
T79	Certain early complications of trauma, NEC	594
L53	Other erythematous conditions	583
I26	Pulmonary embolism	583
I80	Phlebitis and thrombophlebitis	581
N86	Erosion and ectropion of cervix uteri	579
I85	Oesophageal varices	577
I64	Stroke, not specified as haemorrhage or infarction	576
N91	Absent, scanty and rare menstruation	574
J11	Influenza, virus not identified	572
B15	Acute hepatitis A	569
I45	Other conduction disorders	565
G03	Meningitis due to other and unspecified causes	555
K14	Diseases of tongue	549
N02	Recurrent and persistent haematuria	548
N70	Salpingitis and oophoritis	546
I62	Other nontraumatic intracranial haemorrhage	545
F03	Unspecified dementia	542
I34	Nonrheumatic mitral valve disorders	538
L40	Psoriasis	538
H44	Disorders of globe	535
L82	Seborrhoeic keratosis	535
I06	Rheumatic aortic valve diseases	529
J36	Peritonsillar abscess	525
N21	Calculus of lower urinary tract	521
M77	Other enthesopathies	521
D16	Benign neoplasm of bone and articular cartilage	518
J81	Pulmonary oedema	515
I35	Nonrheumatic aortic valve disorders	515
E34	Other endocrine disorders	513
S61	Open wound of wrist and hand	513
K62	Other diseases of anus and rectum	512
H00	Hordeolum and chalazion	504
M62	Other disorders of muscle	501
C23	Malignant neoplasm of gallbladder	494
C85	Other and unspecified types of non-Hodgkin lymphoma	492
G95	Other diseases of spinal cord	487
F48	Other neurotic disorders	485
F01	Vascular dementia	483
E28	Ovarian dysfunction	480
L71	Rosacea	478
H20	Iridocyclitis	477
N04	Nephrotic syndrome	472
I44	Atrioventricular and left bundle-branch block	463
M96	Postprocedural musculoskeletal disorders, NEC	460
M72	Fibroblastic disorders	458
F34	Persistent mood [affective] disorders	457
S93	Dislocation, sprain and strain of joints and ligaments at ankle and foot level	451
I11	Hypertensive heart disease	451
E22	Hyperfunction of pituitary gland	448
L02	Cutaneous abscess, furuncle and carbuncle	443
D65	Disseminated intravascular coagulation [defibrination syndrome]	442
C44	Other malignant neoplasms of skin	442
N34	Urethritis and urethral syndrome	438
I65	Occlusion and stenosis of precerebral arteries, not resulting in cerebral infarction	435
I82	Other venous embolism and thrombosis	429
S09	Other and unspecified injuries of head	426
I46	Cardiac arrest	425
H16	Keratitis	424
S14	Injury of nerves and spinal cord at neck level	424
A04	Other bacterial intestinal infections	417
D14	Benign neoplasm of middle ear and respiratory system	416
F05	Delirium, not induced by alcohol and other psychoactive substances	413
S43	Dislocation, sprain and strain of joints and ligaments of shoulder girdle	411
K72	Hepatic failure, NEC	409
K50	Crohn’s disease[regional enteritis]	406
N32	Other disorders of bladder	404
I27	Other pulmonary heart diseases	403
N03	Chronic nephritic syndrome	400
K51	Ulcerative colitis	399
B01	Varicella[chickenpox]	397
M47	Spondylosis	396
T81	Complications of procedures, NEC	394
I31	Other diseases of pericardium	393
J04	Acute laryngitis and tracheitis	392
M15	Polyarthrosis	390
G24	Dystonia	389
S03	Dislocation, sprain and strain of joints and ligaments of head	387
J05	Acute obstructive laryngitis [croup] and epiglottitis	387
J39	Other diseases of upper respiratory tract	383
S40	Superficial injury of shoulder and upper arm	380
D72	Other disorders of white blood cells	380
F80	Specific developmental disorders of speech and language	379
L60	Nail disorders	374
D32	Benign neoplasm of meninges	374
M20	Acquired deformities of fingers and toes	372
F40	Phobic anxiety disorders	370
E55	Vitamin D deficiency	369
T17	Foreign body in respiratory tract	369
I89	Other noninfective disorders of lymphatic vessels and lymph nodes	369
I66	Occlusion and stenosis of cerebral arteries, not resulting in cerebral infarction	369
B08	Other viral infections characterized by skin and mucous membrane lesions, NEC	368
M24	Other specific joint derangements	365
T58	Toxic effect of carbon monoxide	365
F07	Personality and behavioural disorders due to brain disease, damage and dysfunction	365
E89	Postprocedural endocrine and metabolic disorders, NEC	364
S90	Superficial injury of ankle and foot	363
H49	Paralytic strabismus	360
K09	Cysts of oral region, NEC	359
A75	Typhus fever	357
J12	Viral pneumonia, NEC	357
B16	Acute hepatitis B	356
L98	Other disorders of skin and subcutaneous tissue, NEC	355
K61	Abscess of anal and rectal regions	354
D48	Neoplasm of uncertain or unknown behaviour of other and unspecified sites	353
N35	Urethral stricture	353
T23	Burn and corrosion of wrist and hand	348
O14	Pre-eclampsia	345
K60	Fissure and fistula of anal and rectal regions	343
S68	Traumatic amputation of wrist and hand	341
F33	Recurrent depressive disorder	337
J86	Pyothorax	334
I95	Hypotension	333
H46	Optic neuritis	333
J42	Unspecified chronic bronchitis	332
D29	Benign neoplasm of male genital organs	332
C90	Multiple myeloma and malignant plasma cell neoplasms	332
C91	Lymphoid leukaemia	331
N96	Habitual aborter	328
H61	Other disorders of external ear	328
G57	Mononeuropathies of lower limb	324
N62	Hypertrophy of breast	322
M45	Ankylosing spondylitis	321
H27	Other disorders of lens	320
D30	Benign neoplasm of urinary organs	317
T60	Toxic effect of pesticides	316
G72	Other myopathies	314
D26	Other benign neoplasms of uterus	308
H01	Other inflammation of eyelid	307
L89	Decubitus ulcer and pressure area	304
C19	Malignant neoplasm of rectosigmoid junction	302
K91	Postprocedural disorders of digestive system, NEC	301
L80	Vitiligo	300
L63	Alopecia areata	300
E29	Testicular dysfunction	299
K13	Other diseases of lip and oral mucosa	299
M94	Other disorders of cartilage	298
L91	Hypertrophic disorders of skin	297
N47	Redundant prepuce, phimosis and paraphimosis	297
H74	Other disorders of middle ear and mastoid	296
J85	Abscess of lung and mediastinum	294
O13	Gestational [pregnancy-induced] hypertension	293
H05	Disorders of orbit	291
N12	Tubulo-interstitial nephritis, not specified as acute or chronic	290
H18	Other disorders of cornea	289
C76	Malignant neoplasm of other and ill-defined sites	288
G46	Vascular syndromes of brain in cerebro- vascular diseases(I60-I67†)	286
H47	Other disorders of optic[2nd] nerve and visual pathways	284
E07	Other disorders of thyroid	279
P22	Respiratory distress of newborn	278
G21	Secondary parkinsonism	277
M70	Soft tissue disorders related to use, overuse and pressure	276
N36	Other disorders of urethra	274
K36	Other appendicitis	273
G63	Polyneuropathy in diseases classified elsewhere	272
S66	Injury of muscle and tendon at wrist and hand level	271
O72	Postpartum haemorrhage	270
G54	Nerve root and plexus disorders	270
M87	Osteonecrosis	268
F23	Acute and transient psychotic disorders	266
T24	Burn and corrosion of hip and lower limb, except ankle and foot	264
H72	Perforation of tympanic membrane	262
D70	Agranulocytosis	262
T42	Poisoning by antiepileptic, sedative-hypnotic and antiparkinsonism drugs	258
O64	Obstructed labour due to malposition and malpresentation of fetus	257
C43	Malignant melanoma of skin	256
N75	Diseases of Bartholin’s gland	254
M41	Scoliosis	247
J94	Other pleural conditions	245
K55	Vascular disorders of intestine	242
D46	Myelodysplastic syndromes	240
L93	Lupus erythematosus	239
F44	Dissociative [conversion] disorders	239
P59	Neonatal jaundice from other and unspecified causes	236
O90	Complications of the puerperium, NEC	234
I77	Other disorders of arteries and arterioles	232
M86	Osteomyelitis	231
S46	Injury of muscle and tendon at shoulder and upper arm level	231
S70	Superficial injury of hip and thigh	229
G58	Other mononeuropathies	228
F98	Other behavioural and emotional disorders with onset usually occurring in childhood and adolescence	225
M84	Disorders of continuity of bone	225
D01	Carcinoma in situ of other and unspecified digestive organs	224
S35	Injury of blood vessels at abdomen, lower back and pelvis level	223
D15	Benign neoplasm of other and unspecified intrathoracic organs	222
D37	Neoplasm of uncertain or unknown behaviour of oral cavity and digestive organs	221
D75	Other diseases of blood and blood-forming organs	221
M95	Other acquired deformities of musculoskeletal system and connective tissue	220
S39	Other and unspecified injuries of abdomen, lower back and pelvis	219
S63	Dislocation, sprain and strain of joints and ligaments at wrist and hand level	219
G90	Disorders of autonomic nervous system	218
D47	Other neoplasms of uncertain or unknown behaviour of lymphoid, haematopoietic and related tissue	218
B36	Other superficial mycoses	216
G52	Disorders of other cranial nerves	216
J91	Pleural effusion in conditions classified elsewhere	213
C95	Leukaemia of unspecified cell type	213
F22	Persistent delusional disorders	210
B19	Unspecified viral hepatitis	208
T20	Burn and corrosion of head and neck	208
C11	Malignant neoplasm of nasopharynx	208
S08	Traumatic amputation of part of head	208
L84	Corns and callosities	206
D36	Benign neoplasm of other and unspecified sites	206
L57	Skin changes due to chronic exposure to nonionizing radiation	205
N05	Unspecified nephritic syndrome	204
T30	Burn and corrosion, body region unspecified	203
S50	Superficial injury of forearm	202
H17	Corneal scars and opacities	202
J69	Pneumonitis due to solids and liquids	201
K10	Other diseases of jaws	201
G99	Other disorders of nervous system in diseases classified elsewhere	197
S67	Crushing injury of wrist and hand	196
D28	Benign neoplasm of other and unspecified female genital organs	195
C77	Secondary and unspecified malignant neoplasm of lymph nodes	195
D43	Neoplasm of uncertain or unknown behaviour of brain and central nervous system	195
I24	Other acute ischaemic heart diseases	194
S53	Dislocation, sprain and strain of joints and ligaments of elbow	194
G12	Spinal muscular atrophy and related syndromes	193
N88	Other noninflammatory disorders of cervix uteri	193
N61	Inflammatory disorders of breast	190
L52	Erythema nodosum	190
G70	Myasthenia gravis and other myoneural disorders	189
E83	Disorders of mineral metabolism	189
H92	Otalgia and effusion of ear	188
M71	Other bursopathies	187
F95	Tic disorders	187
G80	Cerebral palsy	187
E30	Disorders of puberty, NEC	186
K43	Ventral hernia	186
G71	Primary disorders of muscles	185
K06	Other disorders of gingiva and edentulous alveolar ridge	185
C49	Malignant neoplasm of other connective and soft tissue	183
N00	Acute nephritic syndrome	182
L64	Androgenic alopecia	182
G04	Encephalitis, myelitis and encephalomyelitis	181
T65	Toxic effect of other and unspecified substances	180
C66	Malignant neoplasm of ureter	180
S86	Injury of muscle and tendon at lower leg level	179
S81	Open wound of lower leg	178
G41	Status epilepticus	177
I40	Acute myocarditis	177
H06	Disorders of lacrimal system and orbit in diseases classified elsewhere	176
T15	Foreign body on external eye	173
I30	Acute pericarditis	173
C41	Malignant neoplasm of bone and articular cartilage of other and unspecified sites	173
C02	Malignant neoplasm of other and unspecified parts of tongue	173
M60	Myositis	171
M85	Other disorders of bone density and structure	170
M00	Pyogenic arthritis	169
I22	Subsequent myocardial infarction	169
C38	Malignant neoplasm of heart, mediastinum and pleura	169
C65	Malignant neoplasm of renal pelvis	169
C13	Malignant neoplasm of hypopharynx	168
T09	Other injuries of spine and trunk, level unspecified	165
S31	Open wound of abdomen, lower back and pelvis	164
M21	Other acquired deformities of limbs	162
D39	Neoplasm of uncertain or unknown behaviour of female genital organs	162
D63	Anaemia in chronic diseases classified elsewhere	160
M34	Systemic sclerosis	159
S64	Injury of nerves at wrist and hand level	158
B44	Aspergillosis	158
I33	Acute and subacute endocarditis	155
E21	Hyperparathyroidism and other disorders of parathyroid gland	155
M12	Other specific arthropathies	155
S51	Open wound of forearm	155
I87	Other disorders of veins	153
I37	Pulmonary valve disorders	152
O68	Labour and delivery complicated by fetal stress [distress]	151
H82	Vertiginous syndromes in diseases classified elsewhere	151
S04	Injury of cranial nerves	151
C62	Malignant neoplasm of testis	150
K28	Gastrojejunal ulcer	150
D59	Acquired haemolytic anaemia	149
H68	Eustachian salpingitis and obstruction	148
N89	Other noninflammatory disorders of vagina	148
T03	Dislocations, sprains and strains involving multiple body regions	148
C17	Malignant neoplasm of small intestine	148
L65	Other nonscarring hair loss	147
O21	Excessive vomiting in pregnancy	146
F60	Specific personality disorders	146
I72	Other aneurysm and dissection	145
M49	Spondylopathies in diseases classified elsewhere	145
A31	Infection due to other mycobacteria	145
G22	Parkinsonism in diseases classified elsewhere	145
L92	Granulomatous disorders of skin and subcutaneous tissue	145
F42	Obsessive-compulsive disorder	143
C09	Malignant neoplasm of tonsil	143
G96	Other disorders of central nervous system	143
C80	Malignant neoplasm without specification of site	142
D44	Neoplasm of uncertain or unknown behaviour of endocrine glands	142
S23	Dislocation, sprain and strain of joints and ligaments of thorax	140
S10	Superficial injury of neck	140
B96	Other specified bacterial agents as the cause of diseases classified to other chapters	139
S54	Injury of nerves at forearm level	139
G06	Intracranial and intraspinal abscess and granuloma	139
I98	Other disorders of circulatory system in diseases classified elsewhere	137
G83	Other paralytic syndromes	135
P36	Bacterial sepsis of newborn	135
L08	Other local infections of skin and subcutaneous tissue	135
S73	Dislocation, sprain and strain of joint and ligaments of hip	134
S56	Injury of muscle and tendon at forearm level	134
G61	Inflammatory polyneuropathy	133
O16	Unspecified maternal hypertension	132
J80	Adult respiratory distress syndrome	132
S91	Open wound of ankle and foot	132
C82	Follicular lymphoma	131
A88	Other viral infections of central nervous system, NEC	131
T01	Open wounds involving multiple body regions	130
C84	Mature T/NK-cell lymphomas	129
N49	Inflammatory disorders of male genital organs, NEC	128
N44	Torsion of testis	127
T63	Toxic effect of contact with venomous animals	127
J96	Respiratory failure, NEC	127
E88	Other metabolic disorders	126
C07	Malignant neoplasm of parotid gland	126
F30	Manic episode	126
C81	Hodgkin lymphoma	126
H73	Other disorders of tympanic membrane	125
C21	Malignant neoplasm of anus and anal canal	124
T83	Complications of genitourinary prosthetic devices, implants and grafts	124
D86	Sarcoidosis	124
B26	Mumps	124
T31	Burns classified according to extent of body surface involved	123
G00	Bacterial meningitis, NEC	122
M31	Other necrotizing vasculopathies	122
O10	Pre-existing hypertension complicating pregnancy, childbirth and the puerperium	121
S16	Injury of muscle and tendon at neck level	118
I12	Hypertensive renal disease	118
L43	Lichen planus	118
D73	Diseases of spleen	116
B30	Viral conjunctivitis	116
K93	Disorders of other digestive organs in diseases classified elsewhere	116
K37	Unspecified appendicitis	115
I38	Endocarditis, valve unspecified	115
G37	Other demyelinating diseases of central nervous system	111
B66	Other fluke infections	110
C72	Malignant neoplasm of spinal cord, cranial nerves and other parts of central nervous system	109
S34	Injury of nerves and lumbar spinal cord at abdomen, lower back and pelvis level	109
M93	Other osteochondropathies	108
A69	Other spirochaetal infections	108
A49	Bacterial infection of unspecified site	108
H69	Other disorders of Eustachian tube	108
F29	Unspecified nonorganic psychosis	107
D66	Hereditary factor Ⅷ deficiency	107
T95	Sequelae of burns, corrosions and frostbite	107
H83	Other diseases of inner ear	107
F02	Dementia in other diseases classified elsewhere	106
O26	Maternal care for other conditions predominantly related to pregnancy	106
M33	Dermatopolymyositis	106
S26	Injury of heart	105
O99	Other maternal diseases classifiable elsewhere but complicating pregnancy, childbirth and the puerperium	104
G31	Other degenerative diseases of nervous system NEC	104
G11	Hereditary ataxia	102
T22	Burn and corrosion of shoulder and upper limb, except wrist and hand	102
L41	Parapsoriasis	101
T85	Complications of other internal prosthetic devices, implants and grafts	101
J64	Unspecified pneumoconiosis	101
D80	Immunodeficiency with predominantly antibody defects	100
O73	Retained placenta and membranes, without haemorrhage	100
T43	Poisoning by psychotropic drugs, nec	99
T25	Burn and corrosion of ankle and foot	99
T21	Burn and corrosion of trunk	99
O66	Other obstructed labour	98
L95	Vasculitis limited to skin, NEC	98
C26	Malignant neoplasm of other and ill-defined digestive organs	97
I08	Multiple valve diseases	97
B34	Viral infection of unspecified site	97
I79	Disorders of arteries, arterioles and capillaries in diseases classified elsewhere	97
E20	Hypoparathyroidism	96
M66	Spontaneous rupture of synovium and tendon	96
S84	Injury of nerves at lower leg level	96
M22	Disorders of patella	95
O65	Obstructed labour due to maternal pelvic abnormality	95
L01	Impetigo	94
E72	Other disorders of amino-acid metabolism	94
E12	Malnutrition-related diabetes mellitus	94
T90	Sequelae of injuries of head	94
I09	Other rheumatic heart diseases	93
P05	Slow fetal growth and fetal malnutrition	93
D45	Polycythaemia vera	92
I07	Rheumatic tricuspid valve diseases	91
H13	Disorders of conjunctiva in diseases classified elsewhere	91
H19	Disorders of sclera and cornea in diseases classified elsewhere	90
A19	Miliary tuberculosis	90
A02	Other salmonella infections	89
C74	Malignant neoplasm of adrenal gland	89
M76	Enthesopathies of lower limb, excluding foot	88
A01	Typhoid and paratyphoid fevers	88
F25	Schizoaffective disorders	88
T59	Toxic effect of other gases, fumes and vapours	87
T16	Foreign body in ear	87
K42	Umbilical hernia	87
C10	Malignant neoplasm of oropharynx	86
D62	Acute posthaemorrhagic anaemia	86
O82	Single delivery by caesarean section	86
E80	Disorders of porphyrin and bilirubin meta- bolism	86
T86	Failure and rejection of transplanted organs and tissues	85
A06	Amoebiasis	85
M16	Coxarthrosis [arthrosis of hip]	85
L75	Apocrine sweat disorders	84
A17	Tuberculosis of nervous system	84
I78	Diseases of capillaries	84
N98	Complications associated with artificial fertilization	84
E79	Disorders of purine and pyrimidine metabolism	83
S99	Other and unspecified injuries of ankle and foot	82
O11	Pre-eclampsia superimposed on chronic hypertension	81
L56	Other acute skin changes due to ultraviolet radiation	81
T93	Sequelae of injuries of lower limb	81
L42	Pityriasis rosea	80
C69	Malignant neoplasm of eye and adnexa	79
B86	Scabies	79
K90	Intestinal malabsorption	79
T26	Burn and corrosion confined to eye and adnexa	79
D31	Benign neoplasm of eye and adnexa	79
S19	Other and unspecified injuries of neck	79
T92	Sequelae of injuries of upper limb	79
C30	Malignant neoplasm of nasal cavity and middle ear	79
T39	Poisoning by nonopioid analgesics, antipyretics and antirheumatics	79
N99	Postprocedural disorders of genitourinary system, NEC	79
D76	Other specified diseases with participation of lymphoreticular and reticulohistiocytic tissue	78
F50	Eating disorders	77
A86	Unspecified viral encephalitis	77
J46	Status asthmaticus	77
C31	Malignant neoplasm of accessory sinuses	77
E02	Subclinical iodine-deficiency hypothyroidism	75
E26	Hyperaldosteronism	75
J70	Respiratory conditions due to other external agents	75
G97	Postprocedural disorders of nervous system, NEC	75
N29	Other disorders of kidney and ureter in diseases classified elsewhere	74
M08	Juvenile arthritis	73
T29	Burns and corrosions of multiple body regions	73
S44	Injury of nerves at shoulder and upper arm level	73
S97	Crushing injury of ankle and foot	73
L05	Pilonidal cyst	72
H30	Chorioretinal inflammation	72
L94	Other localized connective tissue disorders	72
P54	Other neonatal haemorrhages	71
B09	Unspecified viral infection characterized by skin and mucous membrane lesions	71
H54	Visual impairment including blindness (binocular or monocular)	71
C57	Malignant neoplasm of other and unspecified female genital organs	70
F93	Emotional disorders with onset specific to childhood	69
D53	Other nutritional anaemias	69
S24	Injury of nerves and spinal cord at thorax level	69
C75	Malignant neoplasm of other endocrine glands and related structures	68
G59	Mononeuropathy in diseases classified elsewhere	68
S15	Injury of blood vessels at neck level	68
E86	Volume depletion	68
P01	Fetus and newborn affected by maternal complications of pregnancy	68
S69	Other and unspecified injuries of wrist and hand	68
T13	Other injuries of lower limb, level unspecified	68
J92	Pleural plaque	68
C48	Malignant neoplasm of retroperitoneum and peritoneum	67
C37	Malignant neoplasm of thymus	67
G35	Multiple sclerosis	67
F91	Conduct disorders	66
T08	Fracture of spine, level unspecified	66
D07	Carcinoma in situ of other and unspecified genital organs	66
O92	Other disorders of breast and lactation associated with childbirth	65
L74	Eccrine sweat disorders	64
I01	Rheumatic fever with heart involvement	64
F84	Pervasive developmental disorders	64
F28	Other nonorganic psychotic disorders	64
X23	Contact with hornets, wasps and bees	64
S65	Injury of blood vessels at wrist and hand level	63
J60	Coalworker’s pneumoconiosis	63
N82	Fistulae involving female genital tract	63
M40	Kyphosis and lordosis	63
B54	Unspecified malaria	63
F09	Unspecified organic or symptomatic mental disorder	62
B27	Infectious mononucleosis	62
D41	Neoplasm of uncertain or unknown behaviour of urinary organs	61
A46	Erysipelas	61
C68	Malignant neoplasm of other and unspecified urinary organs	61
C40	Malignant neoplasm of bone and articular cartilage of limbs	60
H15	Disorders of sclera	60
M61	Calcification and ossification of muscle	59
T75	Effects of other external causes	59
T54	Toxic effect of corrosive substances	59
D51	Vitamin B12 deficiency anaemia	58
G60	Hereditary and idiopathic neuropathy	58
T91	Sequelae of injuries of neck and trunk	58
S41	Open wound of shoulder and upper arm	57
S96	Injury of muscle and tendon at ankle and foot level	57
D20	Benign neoplasm of soft tissue of retroperitoneum and peritoneum	56
N15	Other renal tubulo-interstitial diseases	55
E65	Localized adiposity	55
F04	Organic amnesic syndrome, not induced by alcohol and other psychoactive substances	55
K44	Diaphragmatic hernia	55
N74	Female pelvic inflammatory disorders in diseases classified elsewhere	54
E75	Disorders of sphingolipid metabolism and other lipid storage disorders	54
P27	Chronic respiratory disease originating in the perinatal period	54
O86	Other puerperal infections	54
N11	Chronic tubulo-interstitial nephritis	52
I23	Certain current complications following acute myocardial infarction	52
T82	Complications of cardiac and vascular prosthetic devices, implants and grafts	52
C08	Malignant neoplasm of other and unspecified major salivary glands	52
P21	Birth asphyxia	52
A98	Other viral haemorrhagic fevers, NEC	51
D58	Other hereditary haemolytic anaemias	51
P95	Fetal death of unspecified cause	51
A42	Actinomycosis	51
O62	Abnormalities of forces of labour	50
C01	Malignant neoplasm of base of tongue	50
G55	Nerve root and plexus compressions in diseases classified elsewhere	50
J82	Pulmonary eosinophilia, NEC	50
N42	Other disorders of prostate	50
D02	Carcinoma in situ of middle ear and respiratory system	50
B25	Cytomegaloviral disease	49
S76	Injury of muscle and tendon at hip and thigh level	49
C96	Other and unspecified malignant neoplasms of lymphoid, haematopoietic and related tissue	49
N90	Other noninflammatory disorders of vulva and perineum	49
H57	Other disorders of eye and adnexa	48
L12	Pemphigoid	48
L10	Pemphigus	48
C06	Malignant neoplasm of other and unspecified parts of mouth	48
J67	Hypersensitivity pneumonitis due to organic dust	48
B69	Cysticercosis	47
M07	Psoriatic and enteropathic arthropathies	47
S11	Open wound of neck	47
O28	Abnormal findings on antenatal screening of mother	47
T67	Effects of heat and light	47
J95	Postprocedural respiratory disorders, NEC	46
W54	Bitten or struck by dog	46
J13	Pneumonia due to Streptococcus pneumoniae	46
C14	Malignant neoplasm of other and ill-defined sites in the lip, oral cavity and pharynx	46
P24	Neonatal aspiration syndromes	46
T80	Complications following infusion, transfusion and therapeutic injection	45
D38	Neoplasm of uncertain or unknown behaviour of middle ear and respiratory and intrathoracic organs	45
T62	Toxic effect of other noxious substances eaten as food	45
B05	Measles	45
B88	Other infestations	45
M91	Juvenile osteochondrosis of hip and pelvis	44
G08	Intracranial and intraspinal phlebitis and thrombophlebitis	44
D04	Carcinoma in situ of skin	43
J10	Influenza due to identified seasonal influenza virus	43
N77	Vulvovaginal ulceration and inflammation in diseases classified elsewhere	43
I00	Rheumatic fever without mention of heart involvement	43
M02	Reactive arthropathies	42
C58	Malignant neoplasm of placenta	42
B51	Plasmodium vivax malaria	42
G64	Other disorders of peripheral nervous system	42
I97	Postprocedural disorders of circulatory system, NEC	42
H03	Disorders of eyelid in diseases classified elsewhere	41
H70	Mastoiditis and related conditions	41
E15	Nondiabetic hypoglycaemic coma	41
L26	Exfoliative dermatitis	41
C94	Other leukaemias of specified cell type	41
H28	Cataract and other disorders of lens in diseases classified elsewhere	40
N23	Unspecified renal colic	40
K77	Liver disorders in disease classified elsewhere	40
P29	Cardiovascular disorders originating in the perinatal period	40
M01	Direct infections of joint in infectious and parasitic diseases classified elsewhere	40
M73	Soft tissue disorders in diseases classified elsewhere	39
L66	Cicatricial alopecia [scarring hair loss]	39
A85	Other viral encephalitis, NEC	39
G01	Meningitis in bacterial diseases classified elsewhere	39
T02	Fractures involving multiple body regions	38
I13	Hypertensive heart and renal disease	38
K46	Unspecified abdominal hernia	38
S98	Traumatic amputation of ankle and foot	38
O71	Other obstetric trauma	38
A38	Scarlet fever	38
D89	Other disorders involving the immune mechanism, NEC	38
F39	Unspecified mood[affective] disorder	38
I36	Nonrheumatic tricuspid valve disorders	38
S87	Crushing injury of lower leg	38
D67	Hereditary factor Ⅸ deficiency	38
T51	Toxic effect of alcohol	37
M14	Arthropathies in other diseases classified elsewhere	37
T19	Foreign body in genitourinary tract	37
O61	Failed induction of labour	37
O23	Infections of genitourinary tract in pregnancy	37
F21	Schizotypal disorder	36
S88	Traumatic amputation of lower leg	36
S18	Traumatic amputation at neck level	36
E85	Amyloidosis	36
F81	Specific developmental disorders of scholastic skills	36
J68	Respiratory conditions due to inhalation of chemicals, gases, fumes and vapours	36
O12	Gestational [pregnancy- induced] oedema and proteinuria without hypertension	36
T71	Asphyxiation	35
A05	Other bacterial foodborne intoxications, NEC	35
J09	Influenza due to identified zoonotic or pandemic influenza virus	35
C52	Malignant neoplasm of vagina	35
L44	Other papulosquamous disorders	35
K87	Disorders of gallbladder, biliary tract and pancreas in diseases classified elsewhere	35
F38	Other mood [affective] disorders	34
N06	Isolated proteinuria with specified morphological lesion	34
E61	Deficiency of other nutrient elements	34
N63	Unspecified lump in breast	34
C51	Malignant neoplasm of vulva	34
T50	Poisoning by diuretics and other and unspecified drugs, medicaments and biological substances	34
S07	Crushing injury of head	33
X20	Contact with venomous snakes and lizards	33
O91	Infections of breast associated with childbirth	33
O80	Single spontaneous delivery	32
M92	Other juvenile osteochondrosis	32
S57	Crushing injury of forearm	32
E46	Unspecified protein-energy malnutrition	32
A40	Streptococcal sepsis	32
C46	Kaposi’s sarcoma	32
J16	Pneumonia due to other infectious organisms, NEC	32
G02	Meningitis in other infectious and parasitic diseases classified elsewhere	32
S85	Injury of blood vessels at lower leg level	32
J17	Pneumonia in diseases classified elsewhere	32
H58	Other disorders of eye and adnexa in diseases classified elsewhere	31
W87	Exposure to unspecified electric current	31
O15	Eclampsia	31
C70	Malignant neoplasm of meninges	31
K38	Other diseases of appendix	31
Y91	Evidence of alcohol involvement determined by level intoxication	31
T87	Complications peculiar to reattachment and amputation	31
T52	Toxic effect of organic solvents	31
D00	Carcinoma in situ of oral cavity, oesophagus and stomach	31
B99	Other and unspecified infectious diseases	30
C05	Malignant neoplasm of palate	30
M99	Biomechanical lesions, NEC	30
S48	Traumatic amputation of shoulder and upper arm	30
E51	Thiamine deficiency	30
S38	Crushing injury and traumatic amputation of part of abdomen, lower back and pelvis	30
K67	Disorders of peritoneum in infectious diseases classified elsewhere	30
C60	Malignant neoplasm of penis	29
S21	Open wound of thorax	29
T46	Poisoning by agents primarily affecting the cardiovascular system	29
J41	Simple and mucopurulent chronic bronchitis	28
G36	Other acute disseminated demyelination	28
H62	Disorders of external ear in diseases classified elsewhere	28
C88	Malignant immunoproliferative diseases	28
S58	Traumatic amputation of forearm	28
E44	Protein-energy malnutrition of moderate and mild degree	28
N25	Disorders resulting from impaired renal tubular function	28
D84	Other immunodeficiencies	27
H55	Nystagmus and other irregular eye movements	27
C39	Malignant neoplasm of other and ill-defined sites in the respiratory system and intrathoracic organs	27
D77	Other disorders of blood and blood-forming organs in diseases classified elsewhere)	27
C55	Malignant neoplasm of uterus, part unspecified	27
P23	Congenital pneumonia	26
T11	Other injuries of upper limb, level unspecified	26
T48	Poisoning by agents primarily acting on smooth and skeletal muscles and the respiratory system	26
G23	Other degenerative diseases of basal ganglia	25
G92	Toxic encephalopathy	25
K45	Other abdominal hernia	25
T33	Superficial frostbite	25
O85	Puerperal sepsis	25
D03	Melanoma in situ	25
A20	Plague	25
B97	Viral agents as the cause of diseases classified to other chapters	25
F99	Mental disorder NOS	25
T38	Poisoning by hormones and their synthetic substitutes and antagonists, NEC	24
S47	Crushing injury of shoulder and upper arm	24
B95	Streptococcus and staphylococcus as the cause of diseases classified to other chapters	24
F94	Disorders of social functioning with onset specific to childhood and adolescence	24
I43	Cardiomyopathy in diseases classified elsewhere	24
F63	Habit and impulse disorders	24
C45	Mesothelioma	23
K41	Femoral hernia	23
W27	Contact with nonpowered hand tool	23
L83	Acanthosis nigricans	23
B98	Other specified infectious agents as the cause of diseases classified to other chapters	23
P91	Other disturbances of cerebral status of newborn	23
N51	Disorders of male genital organs in diseases classified elsewhere	23
P25	Interstitial emphysema and related conditions originating in the perinatal period	22
I32	Pericarditis in diseases classified elsewhere	22
J62	Pneumoconiosis due to dust containing silica	22
D09	Carcinoma in situ of other and unspecified sites	22
L99	Other disorders of skin and subcutaneous tissue in diseases classified elsewhere	22
D42	Neoplasm of uncertain or unknown behaviour of meninges	22
Y42	Hormones and their synthetic substitutes and antagonists, NEC causing adverse effects in therapeutic use	22
L13	Other bullous disorders	22
S49	Other and unspecified injuries of shoulder and upper arm	22
S45	Injury of blood vessels at shoulder and upper arm level	21
W57	Bitten or stung by nonvenomous insect and other nonvenomous arthropods	21
E01	Iodine-deficiency-related thyroid disorders and allied conditions	21
P10	Intracranial laceration and haemorrhage due to birth injury	21
S25	Injury of blood vessels of thorax	21
M83	Adult osteomalacia	21
X09	Exposure to unspecified smoke, fire and flames	21
L00	Staphylococcal scalded skin syndrome	21
P28	Other respiratory conditions originating in the perinatal period	21
J99	Respiratory disorders in diseases classified elsewhere	21
H80	Otosclerosis	21
T28	Burn and corrosion of other internal organs	20
C63	Malignant neoplasm of other and unspecified male genital organs	20
P52	Intracranial nontraumatic haemorrhage of fetus and newborn	20
A48	Other bacterial diseases, NEC	20
B49	Unspecified mycosis	20
S29	Other and unspecified injuries of thorax	20
E63	Other nutritional deficiencies	19
W85	Exposure to electric transmission lines	19
B91	Sequelae of poliomyelitis	19
F83	Mixed specific developmental disorders	19
O74	Complications of anaesthesia during labour and delivery	19
Y84	Other medical procedures as the cause of abnormal reaction of the patient, or of later complication, without mention of misadventure at the time of the procedure	19
T45	Poisoning by primarily systemic and haematological agents, NEC	19
P94	Disorders of muscle tone of newborn	19
S89	Other and unspecified injuries of lower leg	19
S78	Traumatic amputation of hip and thigh	18
D60	Acquired pure red cell aplasia [erythroblastopenia]	18
E50	Vitamin A deficiency	18
S75	Injury of blood vessels at hip and thigh level	18
C00	Malignant neoplasm of lip	18
L59	Other disorders of skin and subcutaneous tissue related to radiation	18
N01	Rapidly progressive nephritic syndrome	18
P77	Necrotizing enterocolitis of fetus and newborn	18
I28	Other diseases of pulmonary vessels	17
A27	Leptospirosis	17
D52	Folate deficiency anaemia	17
S74	Injury of nerves at hip and thigh level	17
T27	Burn and corrosion of respiratory tract	17
E35	Disorders of endocrine glands in diseases classified elsewhere	17
F69	Unspecified disorder of adult personality and behaviour	17
C03	Malignant neoplasm of gum	17
G73	Disorders of myoneural junction and muscle in diseases classified elsewhere	17
W86	Exposure to other specified electric current	16
T34	Frostbite with tissue necrosis	16
S55	Injury of blood vessels at forearm level	16
F54	Psychological and behavioural factors associated with disorders or diseases classified elsewhere	16
B33	Other viral diseases, NEC	16
C86	Other specified types of T/NK-cell lymphoma	16
L68	Hypertrichosis	16
C04	Malignant neoplasm of floor of mouth	16
P93	Reactions and intoxications due to drugs administered to fetus and newborn	16
P35	Congenital viral diseases	16
S71	Open wound of hip and thigh	16
B45	Cryptococcosis	16
O98	Maternal infectious and parasitic diseases classifiable elsewhere but complicating pregnancy, childbirth and the puerperium	15
S94	Injury of nerves at ankle and foot level	15
Y60	Unintentional cut, puncture, perforation or haemorrhage during surgical and medical care	15
L22	Diaper [napkin] dermatitis	15
O70	Perineal laceration during delivery	15
Y57	Other and unspecified drugs and medicaments causing adverse effects in therapeutic use	15
C47	Malignant neoplasm of peripheral nerves and autonomic nervous system	15
X47	Accidental poisoning by and exposure to other gases and vapours	15
I81	Portal vein thrombosis	15
P39	Other infections specific to the perinatal period	15
D40	Neoplasm of uncertain or unknown behaviour of male genital organs	15
P12	Birth injury to scalp	15
T44	Poisoning by drugs primarily affecting the autonomic nervous system	15
M36	Systemic disorders of connective tissue in diseases classified elsewhere	15
B50	Plasmodium falciparum malaria	15
S59	Other and unspecified injuries of forearm	15
W01	Fall on same level from slipping, tripping and stumbling	14
W45	Foreign body or object entering through skin	14
M11	Other crystal arthropathies	14
H51	Other disorders of binocular movement	14
F53	Mental and behavioural disorders associated with the puerperium, NEC	14
E25	Adrenogenital disorders	14
F61	Mixed and other personality disorders	14
H45	Disorders of vitreous body and globe in diseases classified elsewhere	14
N26	Unspecified contracted kidney	14
I68	Cerebrovascular disorders in diseases classified elsewhere	14
B43	Chromomycosis and phaeomycotic abscess	14
T68	Hypothermia	14
G13	Systemic atrophies primarily affecting central nervous system in diseases classified elsewhere	14
P02	Fetus and newborn affected by complications of placenta, cord and membranes	14
J61	Pneumoconiosis due to asbestos and other mineral fibres	14
T69	Other effects of reduced temperature	14
T12	Fracture of lower limb, level unspecified	14
B46	Zygomycosis	14
P20	Intrauterine hypoxia	13
B58	Toxoplasmosis	13
T84	Complications of internal orthopaedic prosthetic devices, implants and grafts	13
X59	Exposure to unspecified factor	13
G05	Encephalitis, myelitis and encephalomyelitis in diseases classified elsewhere	13
F92	Mixed disorders of conduct and emotions	13
Y83	Surgical operation and other surgical procedures as the cause of abnormal reaction of the patient, or of later complication, without mention of misadventure at the time of the procedure	12
B59	Pneumocystosis(J17.3*)	12
T35	Frostbite involving multiple body regions and unspecified frostbite	12
A37	Whooping cough	12
S79	Other and unspecified injuries of hip and thigh	12
L88	Pyoderma gangrenosum	12
F55	Abuse of non-dependence-producing substances	12
P08	Disorders related to long gestation and high birth weight	12
H95	Postprocedural disorders of ear and mastoid process, NEC	12
M42	Spinal osteochondrosis	12
A35	Other tetanus	12
P70	Transitory disorders of carbohydrate metabolism specific to fetus and newborn	12
M90	Osteopathies in diseases classified elsewhere	12
P78	Other perinatal digestive system disorders	11
C12	Malignant neoplasm of pyriform sinus	11
I41	Myocarditis in diseases classified elsewhere	11
G32	Other degenerative disorders of nervous system in diseases classified elsewhere	11
M18	Arthrosis of first carpometacarpal joint	11
L58	Radiodermatitis	11
C93	Monocytic leukaemia	11
J22	Unspecified acute lower respiratory infection	11
P60	Disseminated intravascular coagulation of fetus and newborn	11
E74	Other disorders of carbohydrate metabolism	10
A81	Atypical virus infections of central nervous system	10
O22	Venous complications and haemorrhoids in pregnancy	10
M68	Disorders of synovium and tendon in diseases classified elsewhere	10
B89	Unspecified parasitic disease	10
T05	Traumatic amputations involving multiple body regions	10
T56	Toxic effect of metals	10
B81	Other intestinal helminthiases, NEC	10
T55	Toxic effect of soaps and detergents	10
C33	Malignant neoplasm of trachea	10
Y14	Poisoning by and exposure to other and unspecified drugs, medicaments and biological substances, undetermined intent	10
G94	Other disorders of brain in diseases classified elsewhere	10
T10	Fracture of upper limb, level unspecified	10
P92	Feeding problems of newborn	10
F62	Enduring personality changes, not attributable to brain damage and disease	10
B70	Diphyllobothriasis and sparganosis	10
M03	Postinfective and reactive arthropathies in diseases classified elsewhere	9
P58	Neonatal jaundice due to other excessive haemolysis	9
T61	Toxic effect of noxious substances eaten as seafood	9
V43	Car occupant injured in collison with car, pick-up truck or van	9
D56	Thalassaemia	9
T04	Crushing injuries involving multiple body regions	9
F68	Other disorders of adult personality and behaviour	9
I39	Endocarditis and heart valve disorders in diseases classified elsewhere	9
A03	Shigellosis	9
P90	Convulsions of newborn	9
T47	Poisoning by agents primarily affecting the gastrointestinal system	9
T70	Effects of air pressure and water pressure	9
F88	Other disorders of psychological development	9
B85	Pediculosis and phthiriasis	9
S17	Crushing injury of neck	9
H32	Chorioretinal disorders in diseases classified elsewhere	9
W76	Other accidental hanging and strangulation	9
P71	Transitory neonatal disorders of calcium and magnesium metabolism	9
A07	Other protozoal intestinal diseases	9
F89	Unspecified disorder of psychological development	9
P61	Other perinatal haematological disorders	8
G98	Other disorders of nervous system, NEC	8
Y45	Analgesics, antipyretics and anti-inflammatory drugs causing adverse effects in therapeutic use	8
E76	Disorders of glycosaminoglycan meta- bolism	8
E67	Other hyperalimentation	8
X49	Accidental poisoning by and exposure to other and unspecified chemicals and noxious substances	8
Y20	Hanging, strangulation and suffocation, undetermined intent	8
B42	Sporotrichosis	8
T53	Toxic effect of halogen derivatives of aliphatic and aromatic hydrocarbons	8
Y47	Sedatives, hypnotics and antianxiety drugs causing adverse effects in therapeutic use	8
P13	Birth injury to skeleton	8
L97	Ulcer of lower limb, NEC	8
W46	Contact with hypodermic needle	8
I52	Other heart disorders in diseases classified elsewhere	8
B94	Sequelae of other and unspecified infectious and parasitic diseases	8
V49	Car occupant injured in other and unspecified transport accidents	8
N33	Bladder disorders in diseases classified elsewhere	8
H67	Otitis media in diseases classified elsewhere	8
V03	Pedestrian injured in collision with car, pick-up truck or van	8
E56	Other vitamin deficiencies	8
B06	Rubella [German measles]	8
X14	Contact with hot air and gases	8
P74	Other transitory neonatal electrolyte and metabolic disturbances	8
P38	Omphalitis of newborn with or without mild haemorrhage	7
S28	Crushing injury of thorax and traumatic amputation of part of thorax	7
S77	Crushing injury of hip and thigh	7
M88	Paget’s disease of bone [osteitis deformans]	7
E43	Unspecified severe protein-energy malnutrition	7
X29	Contact with unspecified venomous animal or plant	7
A00	Cholera	7
P14	Birth injury to peripheral nervous system	7
N27	Small kidney of unknown cause	7
A66	Yaws	7
N14	Drug-and heavy-metal- induced tubulo-interstitial and tubular condition	7
L55	Sunburn	7
P96	Other conditions originating in the perinatal period	7
W44	Foreign body entering into or through eye or natural orifice	7
P50	Fetal blood loss	6
C97	Malignant neoplasms of independent (primary) multiple sites	6
Y54	Agents primarily affecting water-balance and mineral and uric acid metabolism causing adverse effects in therapeutic use	6
A77	Spotted fever [tick-borne rickettsioses]	6
T57	Toxic effect of other inorganic substances	6
P72	Other transitory neonatal endocrine disorders	6
G10	Huntington’s disease	6
W13	Fall from, out of or through building or structure	6
A39	Meningococcal infection	6
O69	Labour and delivery complicated by umbilical cord complications	6
E64	Sequelae of malnutrition and other nutritional deficiencies	6
J14	Pneumonia due to Haemophilus influenzae	6
A83	Mosquito-borne viral encephalitis	6
O87	Venous complications and haemorrhoids in the puerperium	6
K23	Disorders of oesophagus in diseases classified elsewhere	6
E53	Deficiency of other B group vitamins	6
T40	Poisoning by narcotics and psychodysleptics [hallucinogens]	6
T97	Sequelae of toxic effects of substances chiefly nonmedicinal as to source	5
O29	Complications of anaesthesia during pregnancy	5
B82	Unspecified intestinal parasitism	5
F82	Specific developmental disorder of motor function	5
H94	Other disorders of ear in diseases classified elsewhere	5
W19	Unspecified fall	5
O75	Other complications of labour and delivery, NEC	5
T96	Sequelae of poisoning by drugs, medicaments and biological substances	5
F59	Unspecified behavioural syndromes associated with physiological disturbances and physical factors	5
A68	Relapsing fevers	5
L11	Other acantholytic disorders	5
N16	Renal tubulo-interstitial disorders in diseases classified elsewhere	5
X48	Accidental poisoning by and exposure to pesticides	5
P26	Pulmonary haemorrhage originating in the perinatal period	5
D74	Methaemoglobinaemia	5
M09	Juvenile arthritis in diseases classified elsewhere	5
W50	Hit, struck, kicked, twisted, bitten or scratched by another person	5
O84	Multiple delivery	5
W31	Contact with other and unspecified machinery	5
D82	Immunodeficiency associated with other major defects	5
H42	Glaucoma in diseases classified elsewhere	5
F64	Gender identity disorders	5
J63	Pneumoconiosis due to other inorganic dusts	5
D83	Common variable immunodeficiency	5
L67	Hair colour and hair shaft abnormalities	5
Y61	Foreign object accidentally left in body during surgical and medical care	5
A24	Glanders and Melioidosis	5
F66	Psychological and behavioural disorders associated with sexual development and orientation	4
B83	Other helminthiases	4
T94	Sequelae of injuries involving multiple and unspecified body regions	4
G07	Intracranial and intraspinal abscess and granuloma in diseases classified elsewhere	4
T36	Poisoning by systemic antibiotics	4
X46	Accidental poisoning by and exposure to organic solvents and halogenated hydrocarbons and their vapours	4
A22	Anthrax	4
T06	Other injuries involving multiple body regions, NEC	4
M63	Disorders of muscle in diseases classified elsewhere	4
L87	Transepidermal elimination disorders	4
D55	Anaemia due to enzyme disorders	4
L62	Nail disorders in diseases classified elsewhere	4
T49	Poisoning by topical agents primarily affecting skin and mucous membrane and by ophthalmological, otorhinolaryngological and dental drugs	4
O83	Other assisted single delivery	4
E70	Disorders of aromatic amino-acid metabolism	4
A80	Acute poliomyelitis	4
B87	Myiasis	4
W10	Fall on and from stairs and steps	4
T37	Poisoning by other systemic anti-infectives and antiparasitics	4
V09	Pedestrian injured in other and unspecified tansport accidents	4
E84	Cystic fibrosis	4
W65	Drowning and submersion while in bath-tub	4
Y19	Poisoning by and exposure to other and unspecified chemicals and noxious substances, undetermined intent	4
A21	Tularaemia	4
E71	Disorders of branched-chain amino-acid metabolism and fatty-acid metabolism	4
E00	Congenital iodine-deficiency syndrome	4
A74	Other diseases caused by chlamydiae	3
P76	Other intestinal obstruction of newborn	3
O88	Obstetric embolism	3
W51	Striking against or bumped into another person	3
A26	Erysipeloid	3
Y51	Drugs primarily affecting the autonomic nervous system causing adverse effects in therapeutic use	3
X50	Overexertion and strenuous or repetitive movements	3
V89	Motor- or nonmotor-vehicle accident, type of vehicle unspecified	3
W74	Unspecified drowning and submersion	3
W93	Exposure to excessive cold of man-made origin	3
E90	Nutritional and metabolic disorders in diseases classified elsewhere	3
P51	Umbilical haemorrhage of newborn	3
Y44	Agents primarily affecting blood constituents causing adverse effects in therapeutic use	3
V04	Pedestrian injured in collision with heavy transport vehicle or bus	3
O63	Long labour	3
Y11	Poisoning by and exposure to antiepileptic, sedative-hypnotic, antiparkinsonism and psychotropic drugs, undetermined intent, NEC	3
Y95	Nosocomial condition	3
D81	Combined immunodeficiencies	3
A99	Unspecified viral haemorrhagic fever	3
E32	Diseases of thymus	3
W18	Other fall on same level	3
X43	Accidental poisoning by and exposure to other drugs acting on the autonomic nervous system	3
P15	Other birth injuries	3
T64	Toxic effect of aflatoxin and other mycotoxin food contaminants	3
W67	Drowning and submersion while in swimming-pool	3
A79	Other rickettsioses	3
D71	Functional disorders of polymorphonuclear neutrophils	3
N07	Hereditary nephropathy, NEC	3
P11	Other birth injuries to central nervous system	3
Y21	Drowning and submersion, undetermined intent	3
Y62	Failure of sterile precautions during surgical and medical care	3
V47	Car occupant injured in collision with fixed or stationary object	3
W79	Inhalation and ingestion of food causing obstruction of respiratory tract	3
A89	Unspecified viral infection of central nervous system	2
B48	Other mycoses, NEC	2
P03	Fetus and newborn affected by other complications of labour and delivery	2
P57	Kernicterus	2
T66	Unspecified effects of radiation	2
A78	Q fever	2
P81	Other disturbances of temperature regulation of newborn	2
W20	Struck by thrown, projected or falling object	2
Y18	Poisoning by and exposure to pesticides, undetermined intent	2
W33	Rifle, shotgun and larger firearm discharge	2
T98	Sequelae of other and unspecified effects of external causes	2
L86	Keratoderma in diseases classified elsewhere	2
Y58	Bacterial vaccines causing adverse effects in therapeutic use	2
E60	Dietary zinc deficiency	2
Y23	Rifle, shotgun and larger firearm discharge, undetermined intent	2
W78	Inhalation of gastric contents	2
U99	Recurrent malignant neoplasm	2
A67	Pinta[carate]	2
B67	Echinococcosis	2
U04	Severe acute respiratory syndrome[SARS]	2
Y17	Poisoning by and exposure to other gases and vapours, undetermined intent	2
W00	Fall on same level involving ice and snow	2
X44	Accidental poisoning by and exposure to other and unspecified drugs, medicaments and biological substances	2
Y52	Agents primarily affecting the cardiovascular system causing adverse effects in therapeutic use	2
E52	Niacin deficiency[Pellagra]	2
O81	Single delivery by forceps and vacuum extractor	2
W26	Contact with other sharp objects	2
F24	Induced delusional disorder	2
Y43	Primarily systemic agents causing adverse effects in therapeutic use	2
W80	Inhalation and ingestion of other objects causing obstruction of respiratory tract	2
Y55	Agents primarily acting on smooth and skeletal muscles and the respiratory system causing adverse effects in therapeutic use	2
Y46	Antiepileptics and antiparkinsonism drugs causing adverse effects in therapeutic use	2
X45	Accidental poisoning by and exposure to alcohol	2
G26	Extrapyramidal and movement disorders in diseases classified elsewhere	2
A28	Other zoonotic bacterial diseases, NEC	2
W59	Bitten or crushed by other reptiles	2
A32	Listeriosis	2
Y88	Sequelae with surgical and medical care as external cause	2
P00	Fetus and newborn affected by maternal conditions that may be unrelated to present pregnancy	2
O89	Complications of anaesthesia during the puerperium	2
T07	Unspecified multiple injuries	2
H22	Disorders of iris and ciliary body in diseases classified elsewhere	1
P37	Other congenital infectious and parasitic diseases	1
E31	Polyglandular dysfunction	1
W22	Striking against or struck by other obiects	1
V78	Bus occupant injured in noncollision transport accident	1
V59	Occupant of pick-up truck or van injured in other and unspecified transport accidents	1
V13	Pedal cyclist injured in collision with car,pick-up truck or van	1
A65	Nonvenereal syphilis	1
V02	Pedestrian injured in collision with two- or three-wheeled motor vehicle	1
B80	Enterobiasis	1
B60	Other protozoal diseases, NEC	1
W06	Fall involving bed	1
Y64	Contaminated medical or biological substances	1
N22	Calculus of urinary tract in diseases classified elsewhere	1
Y00	Assault by blunt object	1
V22	Motorcycle rider injured in collision with two-or three-wheeled motor vehicle	1
Y66	Nonadministration of surgical and medical care	1
V84	Occupant of special vehicle mainly used in agriculture injured in transport accident	1
X28	Contact with other specified venomous plants	1
V73	Bus occupant injured in collision with car, pick-up truck or van	1
X26	Contact with venomous marine animals and plants	1
A71	Trachoma	1
W49	Exposure to other and unspecified inanimate mechanical forces	1
S95	Injury of blood vessels at ankle and foot level	1
V48	Car occupant injured in noncollision transport accident	1
G09	Sequelae of inflammatory diseases of central nervous system	1
B72	Dracunculiasis	1
Y53	Agents primarily affecting the gastrointestinal system causing adverse effects in therapeutic use	1
H48	Disorders of optic[2nd] nerve and visual pathways in diseases classified elsewhere	1
A36	Diphtheria	1
Y59	Other and unspecified vaccines and biological substances causing adverse effects in therapeutic use	1
A43	Nocardiosis	1
X39	Exposure to other and unspecified forces of nature	1
W75	Accidental suffocation and strangulation in chair	1
V12	Pedal cyclist injured in collision with two-or three-wheeled motor vehicle	1
W69	Drowning and submersion while in natural water	1
B76	Hookworm diseases	1
V44	Car occupant injured in collision with heavy transport vehicle or bus	1
E58	Dietary calcium deficiency	1
X22	Contact with scorpions	1
V83	Occupant of special vehicle mainly used on industrial premises injured in transport accident	1
P55	Haemolytic disease of fetus and newborn	1
V29	Motorcycle rider injured in other and unspecified transport accidents	1
H75	Other disorders of middle ear and mastoid in diseases classified elsewhere	1
X58	Exposure to other specified factors	1
V82	Occupant of streetcar injured in transport accident	1
A96	Arenaviral haemorrhagic fever	1
V23	Motorcycle rider injured in collision with car, pick-up truck or van	1
W09	Fall involving playground equipment	1
A92	Other mosquito-borne viral fevers	1
V17	Pedal cyclist injured in collision with fixed or stationary object	1
W38	Explosion and rupture of other specified pressurized devices	1
D19	Benign neoplasm of mesothelial tissue	1
Y30	Falling, jumping or pushed from a high place, undetermined intent	1
A23	Brucellosis	1
V56	Occupant of pick-up truck or van injured in collision with other nonmotor vehicle	1
B53	Other parasitologically confirmed malaria	1
N37	Urethral disorders in diseases classified elsewhere	1
V92	Water-transport-related drowning or submersion without accident to watercraft	1
W34	Discharge from other and unspecifed firearms	1
P75	Meconium ileus in cystic fibrosis(E84.1†)	1
P56	Hydrops fetalis due to haemolytic disease	1
J65	Pneumoconiosis associated with tuberculosis	1
X41	Accidental poisoning by and exposure to antiepilepic, sedative-hypnotic, antiparkinsonism and psychotropic drugs, NEC	1
Y86	Sequelae of other accidents	1
Y85	Sequelae of transport accidents	1
W02	Fall involving ice-skates, skis, roller-skates or skateboards	1
V63	Occupant of heavy transport vehcle injured in collision with car,pick-up truck or van	1
B57	Chagas’ disease	1
B52	Plasmodium malariae malaria	1
E77	Disorders of glycoprotein metabolism	1
B77	Ascariasis	1
V27	Motorcycle rider injured in collision with fixed or stationary object	1
V85	Occupant of special construction vehicle injured in transport accident	1
O95	Obstetric death of unspecified cause	1
X51	Travel and motion	1
W23	Caught, crushed, jammed or pinched in or between objects	1
W07	Fall involving chair	1
Y15	Poisoning by and exposure to alcohol, undetermined intent	1
V90	Accident to watercraft causing drowning and submersion	1
J66	Airway disease due to specific organic dust	1
H59	Postprocedural disorders of eye and adnexa, NEC	1
W92	Exposure to excessive heat of man-made origin	1
W25	Contact with sharp glass	1
W64	Exposure to other and unspecified animate mechanical forces	1
A94	Unspecified arthropod-borne viral fever	1
A84	Tick-borne viral encephalitis	1
V35	Occupant of three-wheeled motor vehicle injured in collision with railway train or railway vehicle	1
U50	Disease Pattern of Six Excesses	1
E73	Lactose intolerance	1
